# Supplementary material for: Modeling the interplay between demography, social contact patterns, and SARS-CoV-2 transmission in the South West Shewa Zone of Oromia Region, Ethiopia
Source: Springer Nature journal article supplement (doi:10.1186/s12916-021-01967-w), 2021-04-08
Supplement: MOESM2 [file 19051112]

# Questionnaire used for conducting the contact study

## PART ONE: SOCIO-DEMOGRAPHIC CHARACTERISTICS

- 1. In the first part, the interviewer is asked to fill in the ID of the participant, place and date of the interview.**

1.1. *Individual participant ID:* |\_|\_|\_|\_|\_|\_|\_|\_|

1.2. *Interview date (dd/mm/yy) :* |\_|\_|\_|\_|\_|\_|\_|\_|\_|\_|

1.3. *Address of the household (Woreda/Kebele) :* |\_\_\_\_\_||\_\_\_\_\_||

- 2. We would first like to ask a few questions about yourself/your child as well as about the people living with you/your child in your household.**

2.1. *Including yourself/your child, could you please list all individuals in your household, as well as the family links between yourself/your child and each of the household members. [A household is the group of individuals living under the same roof and sharing the same kitchen on a daily basis]*



2.2. What is your/your child's primary occupation or daily activity [note to the interviewer: this is the activity the participant spends the most time doing on a daily basis]?

|                      |  |               |  |            |  |
|----------------------|--|---------------|--|------------|--|
| pre-school child     |  | agriculture   |  | retired    |  |
| student (any school) |  | manual worker |  | others     |  |
| office worker        |  | housewife     |  | don't know |  |
| shop worker          |  | unemployed    |  | refused    |  |

2.3. If the participant is a student,

2.3.1. Where is her/his school (Woreda/Kebele)? |\_\_\_\_\_

|/|\_\_\_\_\_|

2.3.2. What is her/his grade? |\_\_\_\_\_ |

2.3.3. How many students are there in her/his class? |\_\_\_\_\_ |

2.4. If the participant is a worker,

2.4.1. Where is her/his place of work (Woreda/Kebele)? |\_\_\_\_\_

|/|\_\_\_\_\_ |

2.4.2. How many individuals are there in her/his workplace? |\_\_\_\_\_ |

## **PART TWO: CONTACTS and MOBILITY**

**1. We would like to ask a few questions about your/your child's contacts on the day before the interview.**

1.1. We will first ask a few more questions about the people you were/your child was in contact with yesterday excluding contacts at school (for both students and teachers) **[A contact is here defined as an interaction between two individuals and it can be either: 1) physical: involving a skin-to-skin contact, such as a handshake or hug; 2) non-physical: involving a two-way conversation with five or more words in the physical presence of another person (standing at most at two-arm distance), but no skin-to-skin contact. Yesterday is defined as the period from wake up yesterday to the moment you woke up this morning]**

| Contact initials/name<br>[will be removed from the questionnaire after the interview] | Contact ID |   |   | Place ID |   |   | Age (yrs) | Sex (M/F) |   | Type of contact |             | Link to the contact |                |                         |        |       | Frequency |                |
|---------------------------------------------------------------------------------------|------------|---|---|----------|---|---|-----------|-----------|---|-----------------|-------------|---------------------|----------------|-------------------------|--------|-------|-----------|----------------|
|                                                                                       | C          | 0 | 1 | S        | 0 | 1 |           | M         | F | Physical        | Nonphysical | Household member    | Other relative | colleague or schoolmate | Friend | Other | Once      | More than once |
|                                                                                       | C          | 0 | 1 | S        | 0 | 1 |           |           |   |                 |             |                     |                |                         |        |       |           |                |
|                                                                                       | C          |   |   | S        | 0 | 1 |           |           |   |                 |             |                     |                |                         |        |       |           |                |
|                                                                                       | C          |   |   | S        | 0 | 1 |           |           |   |                 |             |                     |                |                         |        |       |           |                |
|                                                                                       | C          |   |   | S        | 0 | 1 |           |           |   |                 |             |                     |                |                         |        |       |           |                |
|                                                                                       | C          |   |   | S        | 0 | 1 |           |           |   |                 |             |                     |                |                         |        |       |           |                |
|                                                                                       | C          |   |   | S        | 0 | 1 |           |           |   |                 |             |                     |                |                         |        |       |           |                |
|                                                                                       | C          |   |   | S        | 0 | 1 |           |           |   |                 |             |                     |                |                         |        |       |           |                |
|                                                                                       | C          |   |   | S        | 0 | 1 |           |           |   |                 |             |                     |                |                         |        |       |           |                |
|                                                                                       | C          |   |   | S        | 0 | 1 |           |           |   |                 |             |                     |                |                         |        |       |           |                |
|                                                                                       | C          |   |   | S        | 0 | 1 |           |           |   |                 |             |                     |                |                         |        |       |           |                |
|                                                                                       | C          |   |   | S        | 0 | 1 |           |           |   |                 |             |                     |                |                         |        |       |           |                |
|                                                                                       | C          |   |   | S        | 0 | 1 |           |           |   |                 |             |                     |                |                         |        |       |           |                |
|                                                                                       | C          |   |   | S        | 0 | 1 |           |           |   |                 |             |                     |                |                         |        |       |           |                |
|                                                                                       | C          |   |   | S        | 0 | 1 |           |           |   |                 |             |                     |                |                         |        |       |           |                |

1.2. If the study participant is a student or a teacher  
How many physical contacts has she/he had yesterday at school?

2. We would like to ask a few questions about your/your child's travels outside the Kebele of residence.

2.1.1. Specify the name of the Kebele of the furthest place you/your child visited in the last month: | \_\_\_\_\_ |

2.1.2. How many times did you travel to this place? | \_\_\_\_\_ |

2.1.3. How long did you/your child stay for on average (in days)? | \_\_\_\_\_ |

2.1.4. When was you/your child's last visit to an HC?

|       |  |          |  |           |  |           |  |
|-------|--|----------|--|-----------|--|-----------|--|
| Never |  | < 1 week |  | 2-4 weeks |  | > 1 month |  |
|-------|--|----------|--|-----------|--|-----------|--|

2.1.5. Has you/your child's been admitted to Saint Luke Hospital?

|       |  |          |  |           |  |           |  |
|-------|--|----------|--|-----------|--|-----------|--|
| Never |  | < 1 week |  | 2-4 weeks |  | > 1 month |  |
|-------|--|----------|--|-----------|--|-----------|--|

**3. In this questionnaire, the interviewer will ask the school director some information about the school.**

3.1. School ID: |\_|\_|\_|\_|\_|

3.2. Address of the school (Woreda/Kebele) : |\_\_\_\_\_||\_\_\_\_\_||

3.3. We will now ask a few questions about the structure of the school.

| ID class |   |   | Grade | Students' Minimum age | Students' Maximum age | Number of students | Number of teachers |
|----------|---|---|-------|-----------------------|-----------------------|--------------------|--------------------|
| CL       | 0 | 1 |       |                       |                       |                    |                    |
| CL       | 0 | 2 |       |                       |                       |                    |                    |
| CL       | 0 | 3 |       |                       |                       |                    |                    |
| CL       | 0 | 4 |       |                       |                       |                    |                    |
| CL       | 0 | 5 |       |                       |                       |                    |                    |
